# Supplementary material for: The cold Leidenfrost regime
Source: PubMed Central journal article supplement — Sci Adv. 2019 Jun 28;5(6):eaaw0304. doi: 10.1126/sciadv.aaw0304 (PMC6598769; doi:10.1126/sciadv.aaw0304), 2019-06-28
Supplement: aaw0304_SM.pdf [file aaw0304_SM.pdf]

## Supplementary Materials for

### The cold Leidenfrost regime

Philippe Bourrienne\*, Cunjing Lv, David Quéré\*

\*Corresponding author. Email: philippe.bourrienne@gmail.com (P.B.); david.quere@espci.fr (D.Q.)

Published 28 June 2019, *Sci. Adv.* **5**, eaaw0304 (2019)

DOI: 10.1126/sciadv.aaw0304

#### This PDF file includes:

Fig. S1. Contact radius  $r$  of a water drop placed on a hot superhydrophobic solid, as defined in Fig. 2A.

Fig. S2. Contact angle hysteresis  $\Delta\cos\theta$  on Glaco-coated substrates as a function of  $T$  for drops having initially either a temperature  $T_d = 20^\circ\text{C}$  (blue data) or the same temperature as the substrate ( $T_d = T$ , red data).

Fig. S3. Water adhesion on heated brass coated by a commercial colloidal repellent material (Ultra-Ever Dry, UltraTech International).

Fig. S4. Water adhesion on heated micrometric posts.

Fig. S5. Morphology of a vapor patch.

Fig. S6. Internal flow in water drops ( $R \approx 1.5$  mm) placed on a hot superhydrophobic solid (Glaco-coated wafer).

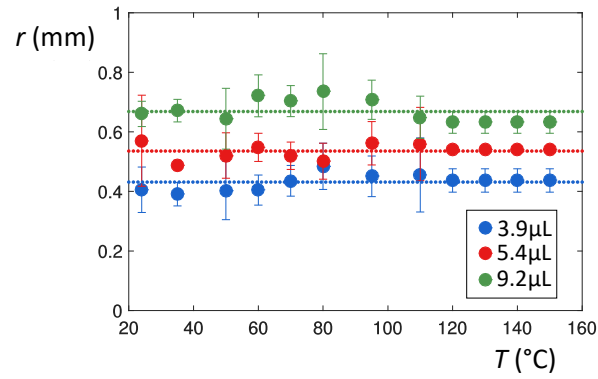

**Fig. S1.** Contact radius  $r$  of a water drop placed on a hot superhydrophobic solid, as defined in Fig. 2A. The substrate is Glaco-treated brass brought at temperature  $T$ . Three drop volumes are investigated:  $\Omega = 3.9 \mu\text{L}$  (blue),  $\Omega = 5.4 \mu\text{L}$  (red) and  $\Omega = 9.2 \mu\text{L}$  (green). The contact radius is found to be roughly independent of the substrate temperature.

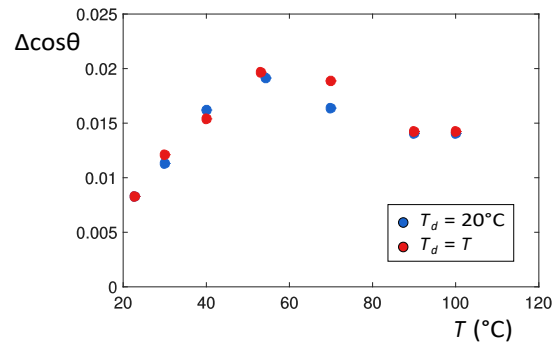

**Fig. S2.** Contact angle hysteresis  $\Delta\cos\theta$  on Glaco-coated substrates as a function of  $T$  for drops having initially either a temperature  $T_d = 20^\circ\text{C}$  (blue data) or the same temperature as the substrate ( $T_d = T$ , red data). Regimes of adhesion appear to be independent of the drop initial temperature.

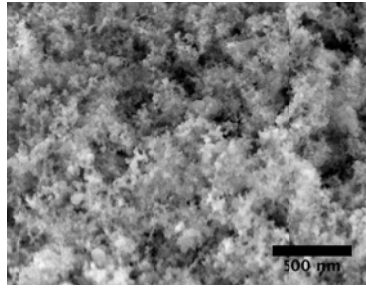

(a)

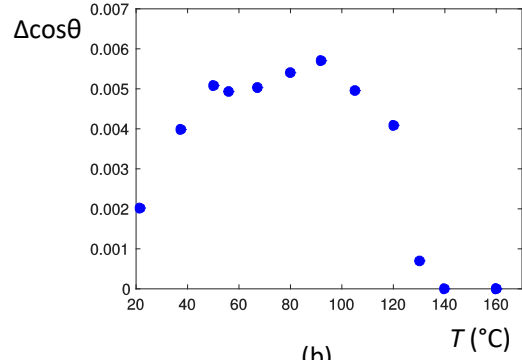

(b)

**Fig. S3. Water adhesion on heated brass coated by a commercial colloidal repellent material (Ultra-Ever Dry, UltraTech International).** (A) SEM picture of the surface of the samples (credits: Anaïs Gauthier). (B) Contact angle hysteresis  $\Delta\cos\theta$  for a millimetre-sized water drop as a function of the substrate temperature  $T$ . We observe the same sequence of regimes as in figure 2c.

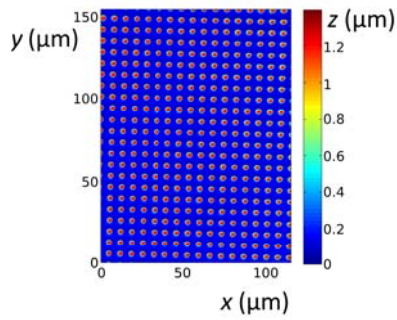

(a)

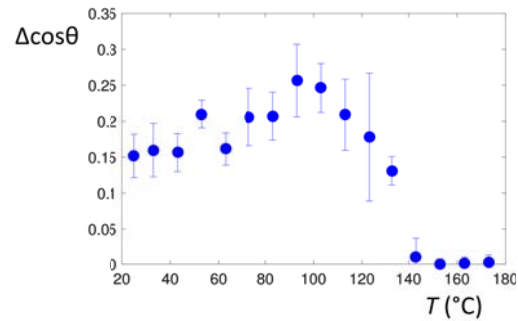

(b)

**Fig. S4. Water adhesion on heated micrometric posts.** (A) Profilometry of the substrate: a silicon wafer etched by Deep Reactive Ion Etching (DRIE) has micro-posts with diameter  $2.6 \mu\text{m}$ , spacing  $6.25 \mu\text{m}$  and height  $1.2 \mu\text{m}$ . (B) Contact angle hysteresis  $\Delta\cos\theta$  as a function of temperature  $T$ . We observe the same regimes as in figures 2c, SI-2 and SI-3, even if adhesion is much larger here, owing to a stronger pinning on micropillars.

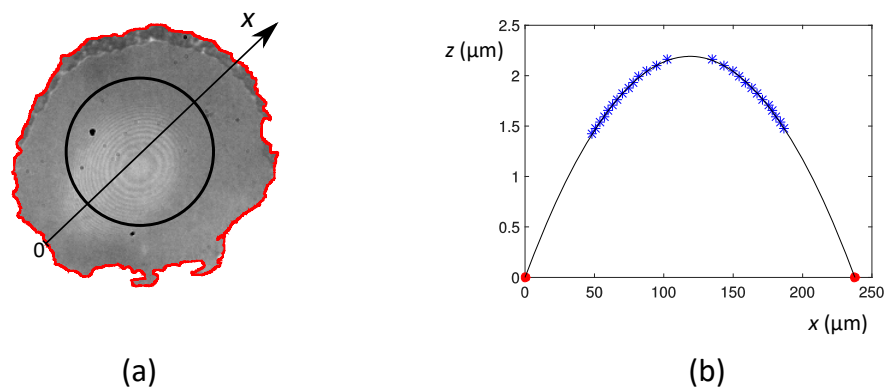

**Fig. S5. Morphology of a vapor patch.** (A) Fringes at the centre of the main vapor patch observed in figures 4b and 4c at  $T = 75^\circ\text{C}$ . (B) We deduce from these fringes the location of the liquid/vapor interface (blue data), which appears to be nicely fitted by a circle (solid line) far from the contact line, in spite of pinning at the contact line. The intersection of this profile with the (red) contact line observed in (a) provides a vapor contact angle  $\theta_v = 2^\circ$ . This very low value implies a weak contact angle hysteresis  $\Delta\cos\theta_v$ , yet large enough to generate visible distortion of the contact line. A low  $\theta_v$  is typical of a superhydrophobic material, and it explains that even a small quantity of vapor (here about 30 pL) can invade macroscopic distances (here about a quarter of a millimeter) at the solid/water interface.

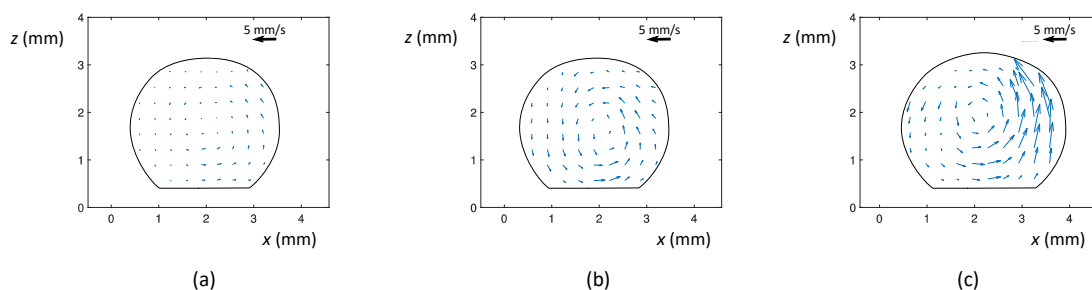

**Fig. S6. Internal flow in water drops ( $R \approx 1.5$  mm) placed on a hot superhydrophobic solid (Glaco-coated wafer).** Observations are performed by PIV (particle image velocimetry) at different solid temperature. In all cases, an inner motion is observed and found to consist in a rolling motion, a symmetry breaking we attribute to confinement. The scale of the velocity vectors is the same in all pictures and given by the bold arrow showing 5 mm/s. (A) At  $T = 50^\circ\text{C}$ , the average and maximum measured velocities of water inside the drop are around 0.5 mm/s and 1 mm/s, respectively. (B) At  $T = 85^\circ\text{C}$ , the average and maximum velocities are around 1.1 mm/s and 2.5 mm/s. (C) At  $T = 107^\circ\text{C}$ , the average and maximum velocities are around 2.4 mm/s and 7.1 mm/s.
